1 **A prospective validation of nomograms based on BC-116 and BC-106**  
2 **urine peptide biomarker panels for bladder cancer diagnostics and**  
3 **monitoring**

4  
5 **Lourdes Mengual<sup>1,2</sup>, Maria Frantzi<sup>3</sup>, Marika Mokou<sup>3</sup>, Mercedes Ingelmo-Torres<sup>1</sup>,**  
6 **Michiel Vlaming<sup>4</sup>, Axel S. Merseburger<sup>5</sup>, Marie C. Roesch<sup>5</sup>, Zoran Culig<sup>6</sup>, Antonio**  
7 **Alcaraz<sup>1</sup>, Antonia Vlahou<sup>7</sup>, Harald Mischak<sup>3,8</sup> and Antoine G. Van der Heijden<sup>4</sup>**

8  
9 <sup>1</sup>Laboratory and Department of Urology, Hospital Clinic de Barcelona, Institut  
10 d'Investigacions Biomèdiques August Pi i Sunyer (IDIBAPS), Centre de Recerca  
11 Biomèdica CELLEX, Universitat de Barcelona, Barcelona, Spain;

12 <sup>2</sup>Department of Biomedical Sciences, Faculty of Medicine and Health Sciences,  
13 University of Barcelona, Barcelona, Spain;

14 <sup>3</sup>Department of Biomarker Research, Mosaiques Diagnostics, Hannover, Germany;

15 <sup>4</sup>Department of Urology, Radboud University Medical Center, 6500 HB Nijmegen, The  
16 Netherlands;

17 <sup>5</sup>University Hospital Schleswig-Holstein, Campus Lübeck, Department of Urology,  
18 Lübeck; Germany;

19 <sup>6</sup>Experimental Urology, Department of Urology, Medical University of Innsbruck,  
20 Innsbruck, Austria;

21 <sup>7</sup>Systems Biology Center, Biomedical Research Foundation, Academy of Athens,  
22 Athens, Greece;

23 <sup>8</sup>Institute of Cardiovascular and Medical Science, University of Glasgow, Glasgow, UK.

24  
25 **Running title:** Prospective validation of nomograms based on BC-116 & BC-106

26  
27 **Keywords:** Biomarker, Bladder Cancer, Diagnosis, Mass Spectrometry, Urine.

28  
29 **Financial Support:**

30 This work was supported by BioMedBC (752755; H2020-MSCA-IF-2016), funded by the  
31 European Commission.

32

33

34 **Corresponding author:**

35 Dr. Maria Frantzi, Mosaiques Diagnostics GmbH, Rotenburger Strasse 20, Hannover D-  
36 30659, Germany; Phone: 0049 51155474429; Fax: 0049 51155474431; E-mail:  
37 [frantzi@mosaiques-diagnostics.com](mailto:frantzi@mosaiques-diagnostics.com)

38

39 **Conflict of interest:**

40 H.M. holds ownership interest in Mosaiques Diagnostics GmbH. M.F. and M.M. are  
41 employed by Mosaiques Diagnostics GmbH. No potential conflicts of interest were  
42 disclosed by the other authors.

43

44 **Notes:**

45 Word count: 4456 (main text)

46 Total number of Figures: 5

47 Total number of Tables: 1

48

49 **Translational Relevance (150- max. 150 words)**

50 Bladder cancer (BC) has the highest lifetime cost per patient among all cancers due to  
51 the high recurrence rate and the need for a long-term patient monitoring. Several  
52 urinary biomarkers have been identified in recent years for BC detection and monitoring.  
53 However, reaching a diagnostic accuracy sufficient for clinical implementation is  
54 challenging. A pilot comparison showed complementarity between cytology and two  
55 previously reported urinary biomarker panels for BC detection (BC-116) and  
56 surveillance (BC-106). Considering this hypothesis, here we present a prospective  
57 multicenter study aiming to evaluate diagnostic nomograms integrating cytology and the  
58 biomarker panels in 602 patients screened for primary and recurrent BC. Overall, the  
59 nomogram including cytology and BC-116 panel demonstrated good performance but  
60 similar to BC-116 alone, in primary BC detection. Notably, the nomogram including BC-  
61 106 panel and cytology showed added value and could be potentially applied for BC  
62 surveillance by reducing the average number of follow-up cystoscopies.

63

64

65

66

67

68 **Abstract (250/250 words)**

69

70 **Purpose:** Non-invasive urine-based biomarkers for bladder cancer (BC) diagnosis  
71 and surveillance can potentially improve current diagnostic and monitoring protocols by  
72 guiding cystoscopy. Here, we aim to assess the diagnostic performance of nomograms  
73 based on published biomarker panels for BC detection (BC-116) and monitoring of  
74 recurrence (BC-106) in combination with cytology, in two prospectively collected patient  
75 cohorts.

76

77 **Experimental Design:** 602 recruited patients were screened for presence of BC,  
78 out of which 551 were found eligible for further analysis. For the primary setting, urine  
79 samples from 73 eligible patients were analyzed from those diagnosed with primary BC  
80 (n=27) and benign urological disorders (n=46). For the surveillance setting, 478 eligible  
81 patients were considered (83 BC recurrences; 395 negative for recurrence). Urine  
82 samples were analyzed with capillary electrophoresis coupled to mass spectrometry  
83 and the biomarker score was estimated via a support vector machine-based software.

84

85 **Results:** Validation of the BC-116 biomarker panel resulted in 89% sensitivity and  
86 67% specificity ( $AUC_{BC-116}=0.82$ ), similar to the published estimates. The nomogram  
87 based on cytology and BC-116 resulted in good ( $AUC_{Nom116}=0.85$ ) but not significantly  
88 better performance than the BC-116 alone ( $P=0.5672$ ). BC-106 biomarker panel  
89 showed 89% sensitivity and 32% specificity for surveillance, while improved  
90 performance was achieved when a nomogram including BC-106 and cytology was  
91 evaluated ( $AUC_{Nom106}=0.82$ ), significantly outperforming both cytology  
92 ( $AUC_{Cyt}=0.72;P=0.0022$ ) and BC-106 alone ( $AUC_{BC-106}=0.67;P=0.0012$ ).

93

94 **Conclusions:** BC-116 biomarker panel is a useful test for detecting primary BC.  
95 BC-106 classifier integrated with cytology and showing >95% negative predictive value,  
96 might be useful for decreasing the number of cystoscopies during surveillance.

97

98

99

## 100 **Introduction**

101 Bladder cancer (BC) has the highest recurrence rate of all cancers. The overall lifetime  
102 risk for BC is 2.4%. In Europe, the age-standardized incidence and mortality rates for  
103 BC are 11.3 and 3.0 per 100,000 person years, respectively (1,2). In the USA, the  
104 respective rate is 10.9 per 100,000 person years, while the annual number of  
105 attributable deaths is 2.1 per 100,000 persons (2,3). Most incident BC cases (roughly  
106 75%) are non-muscle invasive (NMIBC) tumors, exhibiting a 5-year recurrence rate of  
107 50-70% and a 10-30% 5-year progression rate to muscle-invasive disease (MIBC), thus  
108 necessitating long-term patient monitoring (4). Both the timely detection of primary/  
109 incident BC and efficacious surveillance of BC recurrence are vital for optimal patient  
110 outcomes. Cystoscopy remains the gold standard for BC detection (5). However, it is an  
111 invasive and expensive approach, having also potential complications while subtle  
112 recurrences can be easily missed (6). Furthermore, it is bothersome for patients (7).  
113 During the corona pandemic, increased waiting times for cystoscopies, and delayed  
114 diagnoses are more prominent. The European Association of Urology (EAU) (8) gives  
115 priority to patients with high-risk tumors, whereas recommends postponing cystoscopy  
116 by six months for patients with low and intermediate –risk tumors, which might be  
117 stressful for a lot of patients. Urine cytology is still the most accurate non-invasive test  
118 for BC detection having high sensitivity (84%) in high grade (G3) tumors, but low  
119 sensitivity (16%) in low grade tumors (G1), while in experienced hands specificity can  
120 reach values over 90% (5). However, in recent large prospective multicenter studies it  
121 was demonstrated that the performance of urine cytology in contemporary practice  
122 proves to be even lower than previously reported (9). Thus, a clear need for a non-  
123 invasive approach for BC detection and monitoring is evident. Liquid biopsy has yielded  
124 enormous interest in the field of BC (10) with urine being particularly attractive due to its  
125 direct contact with the tumor as well as it can be easily collected in a non-invasive  
126 manner (11).

127 Capillary electrophoresis coupled to Mass Spectrometry (CE-MS) provides high-  
128 resolution proteomics profiling data, is characterized by high reproducibility (12) and has  
129 been applied for the investigation of peptides and low molecular weight proteins as  
130 biomarkers derived from body fluids, especially urine (12,13). Candidate biomarkers can  
131 be sequenced and identified by employing CE coupled to tandem MS (MS/MS) and  
132 liquid chromatography coupled to MS/MS (LC-MS/MS) proteomics platforms (14), in

133 combination with appropriate bioinformatics tools and algorithms that enable CE-MS  
134 data assessment, peptide list extraction and calibration using internal standard peptides  
135 (15). Urinary profiling data acquired by CE-MS have been previously explored for  
136 detection of BC (16) as well as discrimination of NMIBC from MIBC (17). Moreover,  
137 multi-biomarker panels appear advantageous compared to single biomarkers, especially  
138 in the context of complex diseases (18). Towards the need for reducing cystoscopies,  
139 we previously developed two urinary peptide biomarker panels for: i) non-invasive  
140 detection of primary BC (BC-116 biomarker panel) and ii) for monitoring of recurrent BC  
141 in patients undergoing surveillance (BC-106 biomarker panel) (19). To develop both  
142 biomarker panels, in the above initial study a total of 1,357 urine samples from patients  
143 suspected of BC, as well as non-malignant urological controls from five different clinical  
144 centers were analyzed through CE-MS. Among the biomarkers were peptides of Small  
145 proline-rich protein 3, 14-3-3 sigma protein, CD99 antigen, Apolipoprotein A-I,  
146 Fibrinogen  $\alpha$  and  $\beta$ , Beta-2-macroglobulin, Basement membrane-specific heparan  
147 sulfate proteoglycan core protein and Membrane-associated progesterone receptor  
148 component 1. Both biomarker panels exhibited good performance, with the BC-116  
149 biomarker panel reaching 91% sensitivity and 68% specificity, and the BC-106  
150 biomarker panel 87% sensitivity and 51% specificity at the pre-defined threshold. The  
151 area under the ROC curve values (AUCs) were 0.87 and 0.75, for detection of primary  
152 (BC-116) and recurrent (BC-106) urothelial BC, respectively. When investigating the  
153 subpopulation of low/ intermediate-risk patients (NMIBC G1–G2), although in low  
154 number of patients (n=26), BC-106 biomarker panel yielded a sensitivity of 89% in  
155 detecting recurrent BC (AUC=0.72). Additionally, the negative predictive value (NPV)  
156 and positive predictive value (PPV) of BC-116 were estimated at 81.3% and 83.2%  
157 (considering a prevalence rate of 63.5%), while for BC-106 at 93.6% and 32.3%  
158 respectively (accounting for a prevalence of 21.2%) (19). The predictive value of BC-  
159 106 biomarker panel for BC relapse was also evaluated in a follow-up study indicating a  
160 prognostic potential of the urinary biomarker panel based on the peptidomics profile in  
161 prognosis of BC recurrence [HR: 3.15; 1.73-5.70 (95% CI); P=0.0002] (20).

162 Based on the above biomarker panels, a pilot assessment showed an added value of  
163 the urine biomarker panels when combined with cytology, and thus demonstrated a  
164 level of complementarity between the two urological investigations (19). Considering  
165 this hypothesis, here we present a multicenter clinical study with the aim to evaluate  
166 diagnostic nomograms based on cytology and the BC-116 and BC-106 peptide

167 biomarkers in a prospective setting. To this end, 602 patients were recruited, those with  
168 suspicious symptoms or under surveillance that were scheduled for cystoscopic  
169 examination to investigate presence of BC.

170

## 171 **Materials and Methods**

### 172 ***Study design and participants***

173 In this study, 602 patients with suspicious symptoms for BC and those patients under  
174 surveillance because of a previous BC diagnosis were enrolled at the Radboud  
175 University Medical Center in Nijmegen (The Netherlands) and at the Hospital Clinic of  
176 Barcelona (Spain). Out of the 602 patients, 18 were excluded due to the presence of  
177 other cancers / comorbidities including: i) upper urinary tract cancer (n=14), ii) prostate  
178 cancer (n=2), iii) renal cell carcinoma (n=1) and iv) pancreatic carcinoma (n=1). Of the  
179 remaining 584 patients, 33 initially defined as positive for BC (based on cystoscopy)  
180 were further excluded as histopathological data based on transurethral resection of the  
181 bladder tumor (TURB-T) or biopsy were either not available or reported a benign lesion.  
182 Therefore, the positive cystoscopy result could not be confirmed. Among the 551  
183 eligible patients, 366 were recruited at the Hospital Clinic of Barcelona and 208 at the  
184 Radboud University Medical Center. For the biomarker panel validation, the patients  
185 were stratified into two cohorts: a) the primary group including 73 patients positive for  
186 primary BC and those with suspicious symptoms scheduled for cystoscopy, and b) the  
187 recurrent group, including 478 patients under surveillance, as presented in detail below.  
188 In all cases the presence of bladder tumors was confirmed with cystoscopy and  
189 histological confirmation (biopsy or TURB-T). Tumor grade and stage were determined  
190 according to WHO criteria (21) and Tumor Node Metastasis (TNM) classification (22),  
191 respectively. Tumors were classified according to their risk of recurrence and  
192 progression into high, intermediate, or low risk based on the EAU guidelines published  
193 in 2018 (23). The study was performed in accordance with the Declaration of Helsinki  
194 and ethical approval was obtained by local Ethics Committees. Informed consent  
195 processes adhered to Institutional Review Board-approved guidelines. Ethical approval  
196 for this study was obtained by the Ethics Committee in Medical School of Hannover (ID:  
197 3274-2016). A schematic representation of the study design is presented in **Figure 1**.

198

199

200 ***Primary cohort***

201 For assessing primary urothelial BC, 73 eligible participants, as per availability, were  
202 evaluated. Forty- six patients were enrolled at the Hospital Clinic of Barcelona whereas  
203 the remaining 27, were patients undergoing cystoscopy at Radboud University Medical  
204 Center. Among the 73 patients, 27 were diagnosed with primary urothelial BC whereas  
205 the remaining 46 presented with suspicious symptoms for BC, hematuria, or suffered  
206 from other urological diseases (e.g. acute cystitis, nephrolithiasis) and served as  
207 urologic controls. At the time of recruitment all patients with primary tumors did not have  
208 a prior history of urothelial cell carcinoma and underwent transurethral resection to  
209 radically remove the bladder tumor. The cohort characteristics are summarized in **Table**  
210 **1** and the full list of patient clinical data is given in **Supplementary Table S1**.

211

212 ***Recurrent cohort***

213 For the evaluation of BC recurrence, 511 patients scheduled for follow-up monitoring  
214 cystoscopies due to prior history of BC were analyzed in compliance with the EAU  
215 guidelines and the European Organization for Research and Treatment of Cancer  
216 (EORTC) recurrence and progression scores (23). Among these were 320 patients  
217 undergoing cystoscopy at the Hospital Clinic of Barcelona and 181 at the Radboud  
218 University Medical Center. In both clinical centers, BC recurrence was confirmed by  
219 cystoscopy and histological assessment. Negative score at cystoscopy was used to  
220 exclude recurrence and define controls. The recurrent cohort comprised of 83 confirmed  
221 BC cases and 395 negative for recurrence controls. Of the 83 relapses, 79 were NMIBC  
222 (Ta, CIS, T1) and 4 MIBC ( $\geq$ T2) cases. The cohort characteristics are summarized in  
223 **Table 1** and the full list of patient clinical data is given in **Supplementary Table S2**.  
224 Complete information about the clinicopathological tumor characteristics (including risk,  
225 stage, and grade) for the previously diagnosed BC tumors is also provided  
226 (**Supplementary table S2**).

227

228 ***Urine collection and cytologic evaluation***

229 All urine samples were collected prior to cystoscopy, if applicable the day before the  
230 TURB-T or the day before cystectomy. Voided urine samples were collected in sterile  
231 containers and immediately stored at -20°C until further processing. From all patients  
232 and controls, only one single sample was included. Without being mandatory, patients

233 were advised to have cytology at cystoscopy or during the period between cystoscopy  
234 and surgery. Urine cytology was performed according to Papanicolaou staining and  
235 evaluated by expert pathologists in each center blinded to the patient's clinical history.  
236 The results were considered as positive or negative.

237

### 238 ***Sample preparation and CE-MS analysis***

239 Urine sample preparation and CE-MS analysis was performed according to previous  
240 reports (19,20,24). In brief, 700  $\mu$ l of each urine sample were diluted with two volumes  
241 alkaline buffer containing 2 M urea, 10 mM NH<sub>4</sub>OH and 0.02% SDS (pH 10.5).  
242 Thereafter, the samples were concentrated at 1.1 ml using Centriscart ultracentrifugation  
243 filters with a cut-off of 20 kDa (Sartorius, Göttingen, Germany) after centrifugation at  
244 3,000g. The filtrate was then desalted using PD-10 columns (GE Healthcare, Munich,  
245 Germany) and equilibrated in 0.01% NH<sub>4</sub>OH in HPLC-grade water. The peptide extracts  
246 were lyophilized and stored at 4°C until further use. CE-MS analysis was performed  
247 using a P/ACE MDQ capillary electrophoresis system (Beckman Coulter, Fullerton,  
248 USA) on-line coupled to a MicroTOF MS (Bruker Daltonic, Bremen, Germany), as  
249 described previously (19,20). Mass spectral ion peaks representing identical molecules  
250 at different charge states were deconvoluted into single masses using MosaiquesVisu  
251 software (25). In addition, migration time and ion signal intensity (amplitude) were  
252 normalized using 29 internal peptide standards with excretion levels unaffected by any  
253 disease state (26). The resulting peak list characterizes each peptide by its molecular  
254 mass [kDa], normalized migration time [min], and normalized signal intensity. The  
255 detected peptides were annotated, matched and deposited in a Microsoft SQL database  
256 (Human Urinary Proteome Database (12,27)) and used as an input in the present study.  
257 Accuracy, precision, selectivity, sensitivity, reproducibility, and stability were reported  
258 previously (16,24).

259

### 260 ***Statistical Analysis***

261 The proportion, mean, standard deviation, median and interquartile range (25th–75th  
262 percentiles) estimates were calculated to describe the distribution of the different  
263 variables in the patients' cohorts (summarized in **Table 1**). The biomarker panels'  
264 scores were calculated via the support vector machine (SVM)-based software, namely



265 MosaCluster (version 1.7.0), as previously described (19). Sensitivity and specificity of  
266 the biomarker panels were estimated based on the number of correctly classified  
267 samples, as defined by cystoscopy. Confidence intervals (95% CI) were based on exact  
268 binomial calculations and were calculated along with the receiver operating  
269 characteristic (ROC) plots in MedCalc® Version 12.1.0.0 (Mariakerke, Belgium). The  
270 area under the ROC curve (AUC) was evaluated to estimate the overall accuracy  
271 independent upon a particular threshold (28). The relationship of BC-116 and BC-106  
272 panel with cytology was established using multiple linear regression analyses.

273

## 274 **Results**

### 275 ***Validation of the BC-116 biomarker panel for detection of primary BC***

276 First, assessment of the BC-116 biomarker panel alone was performed to investigate its  
277 significance for the BC detection. For the evaluation of the BC-116 biomarker panel, the  
278 primary patient cohort was utilized, including 27 patients with primary urothelial BC and  
279 46 patients presenting with non-malignant urological conditions. As shown in **Figure 2a**,  
280 the AUC for BC-116 biomarker panel ( $AUC_{BC-116}$ ) was estimated at 0.82 with the 95% CI  
281 ranging from 0.71 to 0.90 ( $P < 0.0001$ ). At the validated cut-off level of -0.27, the  
282 sensitivity was estimated at 89% and the specificity at 67%. The classifier correctly  
283 classified 24 out of the 27 primary BC cases whereas 15 out of the 46 urological  
284 controls were misclassified as BC cases. Considering a prevalence rate of 37%, as  
285 estimated on the basis of the participating centers, the NPV was computed at 91%  
286 (95% CI 61% to 100%) while the PPV was estimated at 61% (95% CI 33% to 85%). As  
287 presented in **Figure 2B**, the BC-116 biomarker panel significantly discriminated  
288 urothelial BC cases from controls ( $P < 0.0001$ , Kruskal-Wallis H test) but also separated  
289 controls from cases according to their TNM stage and grade ( $P < 0.05$ , Kruskal-Wallis H  
290 test; **Figure 2C-D**).

291

### 292 ***Comparative assessment of BC-116 with cytology***

293 For 58 (out of 73) patients of the primary cohort, data from the cytologic evaluation of  
294 the urine samples were available (**Supplementary Table 1**). Sensitivity of cytology for  
295 detecting primary BC was estimated at 42.3% while sensitivity of the classifier was  
296 88.5% in this subset of patients. Twelve of the 26 primary BC cases were detected by  
297 the BC-116 biomarker panel but were missed by urine cytology. Notably, out of these 12

298 patients, eight were bearing low grade BC tumors (TaG1) but were also three patients  
299 with high grade NMBC (T1G3) and one with MIBC that were missed by cytology and  
300 detected by the BC-116. Three cases that were not detected by the BC-116 panel were  
301 also missed by urine cytology. These were all patients bearing low grade BC (TaG1).  
302 Along these lines, the NPV was higher for the BC-116 classifier (91.2%, 95% CI 60.9 –  
303 99.7) than that of the urine cytology (73.2%, 95% CI 49 – 90.2). Nevertheless, PPV was  
304 higher for urine cytology (77.9%, 95% CI 26.7 – 99.2) than for the BC-116 classifier  
305 (61.3%, 95% CI 31.4 – 86.0). Specificity of cytology was higher than that of the BC-116  
306 panel (93.7% and 67.2% respectively). Multivariate analysis showed that BC-116  
307 biomarker panel performed significantly better than cytology in primary BC detection,  
308 presenting an AUC value 0.84 (95% CI 0.72-0.92) for the classifier and 0.68 (95% CI  
309 0.55-0.80) for cytology (P=0.0195 for pairwise comparison) (**Figure 3A**).

310

### 311 ***Integrative nomogram including BC-116 and cytology for detecting primary BC***

312 An integrated nomogram based on the BC-116 based urinary biomarker panel and  
313 cytology was also examined in the primary patient cohort. As shown in **Figure 3B**, the  
314 AUC for the integrative nomogram was estimated 0.85 (0.73-0.93; 95% CI; P< 0.0001)  
315 only slightly but not significantly higher than the BC-116 alone (0.84; P= 0.5672) yet  
316 significantly higher than cytology alone (0.68; P= 0.0016). At the optimal cut-off level of  
317 0.39, the sensitivity was estimated at 84.6% and the specificity at 75%. The integrative  
318 nomogram correctly classified 23 out of the 26 primary BC cases whereas 9 out of the  
319 32 controls were misclassified. Considering a prevalence rate of 37%, as estimated on  
320 the basis of the participating centers, the NPV was computed at 89.5% (95% CI 60% to  
321 99%) while PPV was estimated at 66.6% (95% CI 35% to 90%).

322

### 323 ***Validation of the BC-106 biomarker panel for detection of recurrent BC***

324 The performance of the BC-106 biomarker panel for detection of bladder cancer  
325 recurrence was evaluated in 478 patients. Among those, were 83 patients bearing a  
326 histopathologically confirmed BC recurrence and 395 controls negative for recurrence.  
327 As presented in **Figure 4A**, the AUC was estimated at 0.67 with the 95% CI ranging  
328 from 0.63 to 0.72. At the previously established cut-off of -0.63, sensitivity was  
329 estimated at 90.4% whereas specificity at 29.1%. This means that 75 out of the 83  
330 recurrences were correctly classified as positive by the BC-106 biomarker panel.  
331 However, the number of correctly classified negative controls was only 112. Accounting

332 for a prevalence of 17.4% in the investigated population, the NPV was estimated at  
333 93.2% (95% CI 73.3% - 99.6%) while the PPV was calculated at 21.1% (95% CI 11.7%  
334 to 33.4%).

335

### 336 **Comparison of BC-106 biomarker panel performance with urine cytology**

337 Urine cytology was performed in 318 patients of which, based on cystoscopy, 36 were  
338 positive for recurrence cases and 282 were negative for recurrence controls. Sensitivity  
339 of the BC-106 biomarker panel for detecting recurrent BC was higher than the one of  
340 cytology (91.6% and 50.0% respectively) in this subset of samples. However, the  
341 specificity BC-106 biomarker panel was lower than the one of cytology (31.2% for the  
342 classifier and 94.7% for cytology). Based on the ROC curve analysis, the estimated  
343 AUCs were reported to be comparable between the two tests [AUC for BC-106 was  
344 0.67 (0.61 to 0.72; 95% CI), while AUC for cytology was 0.72 (0.67 to 0.77; P for  
345 difference between the 2 tests =0.3853), (**Figure 4B**).

346

### 347 ***Integrative nomogram including BC-106 and cytology for detecting recurrent BC***

348 An integrative nomogram based on the BC-106 biomarker panel and cytology was  
349 further validated in 318 patients from the recurrence cohort, for which the results from  
350 the cytological examination were available. An improved diagnostic performance was  
351 observed when the BC-106 classifier was integrated with urine cytology (AUC = 0.82,  
352 95% CI 0.77-0.86, P< 0.0001), **Figure 5A**. At the optimal cut-off of 0.06, sensitivity was  
353 estimated at 86% whereas specificity at 61%. Out of the 36 recurrent BC cases, 31  
354 were correctly classified as positive by the integrative nomogram and out of 282, 172  
355 patients were correctly classified as controls (negative for recurrence). Accounting for a  
356 prevalence of 17.4% in the investigated population, the NPV was estimated at 95.4%  
357 (95% CI 74.9% - 99.9%) while the PPV was calculated at 31.7% (95% CI 11.3% to  
358 59.1%). The nomogram was found of significantly improved performance in comparison  
359 to cytology alone [AUC<sub>NOM106</sub> was 0.74 (0.69 to 0.78; 95% CI) while AUC for cytology  
360 was 0.72 (0.67 to 0.77; P=0,0022)], but also compared to the BC-106 biomarker panel  
361 alone [AUC for BC-106 was 0.66 (0.61 to 0.72; 95% CI; P= 0.0012)]. As presented in  
362 **Figure 5B**, the integrative nomogram significantly discriminated recurrent BC cases  
363 from negative for recurrence controls (P= 0.0005, Kruskal-Wallis H test), but also  
364 separated patients with recurrent BC from those negative for recurrence (controls)  
365 according to their TNM stage and grade (P< 0.05, Kruskal-Wallis H test; **Figure 5C-D**).

366

367 **Reducing the number of follow-up cystoscopies by using the Nomogram BC-106/**  
368 **cytology**

369 In the participating clinical centers of the study, recurrence was detected in 15.6% of all  
370 follow-up cystoscopies while 84% of the patients previously diagnosed with BC were  
371 without recurrence at the time of follow-up cystoscopy. At the cutoff point value of 0.06  
372 of the integrative nomogram sensitivity was 86% whereas specificity at 61%. With a  
373 very high NPV value (estimated at 95.4%) based on the nomogram, 172 out of 282  
374 patients truly did not bear any recurrence, while only 4 out of the 36 cases would have  
375 been missed. All four patients were carrying a low grade BC (TaG1). Based on this, and  
376 assuming that patients who present a negative classification based on the integrative  
377 nomogram (n=172) will not undergo a cystoscopy, more 60% of all cystoscopies could  
378 be prevented, at the cost of 14% of low grade recurrences remaining undiagnosed.

379

380 **Discussion**

381 Within the last decade several urinary biomarkers have been developed for BC  
382 detection and monitoring (summarized in (29,30)), including among others various  
383 promising proteomics and peptidomics biomarkers identified by mass spectrometry (31).  
384 To date, none of these biomarkers have replaced cystoscopy as the gold standard for  
385 diagnosis and surveillance or has been accepted for diagnosis or follow-up in routine  
386 practice or clinical guidelines (5,28). The lack of validation studies presents a challenge  
387 in the expanding field of urinary biomarkers, thus delaying their uptake in the clinical  
388 setting. In the present prospective study two unique urinary peptide-based biomarker  
389 panels that were previously developed for detecting primary (BC-116 panel) and  
390 recurrent urothelial BC (BC-106) based on CE-MS proteomics analyses (19) were  
391 prospectively validated.

392 The BC-116 biomarker panel initially developed for detection of primary BC (19)  
393 demonstrated excellent reproducibility in this prospective cohort study. BC-116  
394 exhibited good performance ( $AUC_{BC-116}$  0.82) that was comparable to the one previously  
395 described (AUC 0.87) (19). Furthermore, BC-116 sensitivity and specificity (89% and  
396 67% respectively) were similar to those previously reported (91% sensitivity and 68%  
397 specificity) (19). In this prospective study, BC-116 again performed better than cytology

398 and successfully classified the majority of the BC cases (panel: 24/27 patients; cytology:  
399 11/27 patients). Cytology missed 58% of the tumors, similarly to other studies (32) and  
400 did not identify any BC cases that were not previously identified by the BC-116  
401 classifier. Interestingly, 82% of the cases that were missed by cytology were correctly  
402 classified by the panel, while three cases that were missed by BC-116 were all low  
403 grade BC. The negative predictive value of the classifier was also higher than cytology's  
404 (91% versus 73%). Additionally, an integrative nomogram including BC-116 and  
405 cytology was investigated, showing, however only slightly increased performance over  
406 the BC-116 alone. These results provide a strong argument for using BC-116 instead of  
407 cytology. Considering that CE-MS is validated platform that is applied for routine  
408 diagnostics, BC-116 biomarker panel could be potentially applied in clinical practice  
409 even as an adjunct to cystoscopy to detect primary or missed tumors. Yet, a cost-  
410 effectiveness analysis is required to demonstrate economic efficiency.

411 For detection of recurrence, the BC-106 panel exhibited similar performance than urine  
412 cytology, lower than previously reported (19). The observed reduced performance is  
413 mostly attributed to the misclassification of almost half of the negative for recurrence  
414 patients. The reduced specificity of BC-106 for detecting recurrent BC could be  
415 attributed to differences in the study population and the demographics of the patients. In  
416 the initial study, patients with a minimum of one year recurrence- free follow up were  
417 investigated, while in this prospective setting, any patient during the regular BC  
418 monitoring setting was included, mainly NMIBC (>98%). Importantly, BC-106 showed  
419 complementary value with cytology. This fact was already previously observed and has  
420 now been replicated in this study. Based on this, the previously reported integrative  
421 nomogram including BC-106 and cytology, was also assessed, demonstrating  
422 significantly increased performance compared to both cytology alone and the BC-106  
423 alone.

424 Based on the performance estimates, accounting for NPV values of >90% for primary  
425 and >95% for surveillance, the availability of highly sensitive urine peptide markers, in  
426 combination with cytology allows for the reduction of the number of follow-up  
427 cystoscopies as in the clinical practice only patients with a positive test will undergo  
428 cystoscopy, whereas for those with a negative test cystoscopy could be postponed/  
429 skipped (33). The integrative nomogram, including BC-106 classifier and cytology, ruled  
430 out 172 of the 282 samples, theoretically reducing the number of follow up cystoscopies

431 by factor 2. Based on the integrative BC-106 model, approximately 14% of the BC  
432 patients at follow-up were incorrectly misclassified as not having recurrence, but these  
433 were all low grade recurrent BC. Yet, even cystoscopy which is the gold standard  
434 misses up to 15% of the papillary and up to 30% of the flat lesions (34). These findings  
435 along with the high NPV of the integrative nomogram further supports that a voided  
436 urine sample can rule out BC with high confidence; thus reducing the number of  
437 cystoscopies and minimizing patients' discomfort.

438 Both BC-116 and BC-106 have similar performance as other FDA-approved and/or  
439 currently under investigation urinary tests. To date, there are six urinary tests approved  
440 by the FDA for clinical use in conjunction with cystoscopy (29,30). Among these,  
441 NMP22 Bladder Cancer ELISA test, NMP22 BladderChek point-of-care test and  
442 UroVysion have FDA approval for diagnosis and surveillance whereas immunocyte  
443 (UCyt+), BTA-TRAK, and BTA-STAT have been approved for BC surveillance following  
444 the diagnosis of a primary tumor (29). Several meta-analyses studies have been  
445 conducted to evaluate the performance of these panels and a remarkably broad  
446 variation in the range of the sensitivity, specificity, NPV and PPV has been observed  
447 (30). For instance, in a meta-analysis study of NMP22 BladderChek it was shown that  
448 for detecting BC, the pooled sensitivity of the test was 56%, specificity was 88% and the  
449 AUC value was 0.83 (35). Similarly, in another study evaluating the utility of UroVysion,  
450 it was shown that the overall sensitivity, specificity, PPV, and NPV in detecting BC were  
451 61.9%, 89.7%, 53.9%, and 92.4%, respectively (36). The performance rates of BC-116  
452 and BC-106 panels are at least as good as the FDA-approved tests. However,  
453 considering potential confounding factors and the significant variations in the clinical  
454 setting, a direct comparison of our biomarkers with the FDA-approved based on the  
455 data currently available is complicated and difficult to be accomplished.

456 A high NPV is important when the panel has a negative score and represents a point of  
457 reference to spare unnecessary cystoscopies. This value is critical especially in high-  
458 grade disease where a negative biomarker test could result in a missed cancer, thus  
459 having detrimental effects with respect to disease progression (30). In the present  
460 study, the layout of the clinical settings closely represents a "real-clinical setting"  
461 situation. Considering the prevalence rate of each cohort in this study, the NPV was  
462 computed at 89.5% for the integrative nomogram of BC-116 classifier and cytology for  
463 detecting primary BC and at 95.4% for the integrative nomogram of BC-106 and  
464 cytology for detecting BC recurrence, comparable to the previous study (19). Thus, both

465 panels demonstrated high NPV values that may offer benefit to patients with high-risk  
466 disease (either with hematuria at primary diagnosis or under surveillance).  
467 One of the limitations of this study is that potential confounding factors such as clinical  
468 treatments before the last recurrence were not available for all patients and thus were  
469 not considered. Nevertheless, as shown in the initial study, prior treatment did not affect  
470 the urinary peptidomic profiles (19). As another limitation of our study, follow-up data  
471 were not accessible for all patients. Thus, correlation analysis of false positives cases  
472 with later recurrences was not feasible. Therefore, no conclusion can be made on false-  
473 positives of BC-116 and BC-106 biomarker panels since they could be attributed to  
474 early detection of subclinical recurrence that could not be detected by cystoscopy. This  
475 has been previously described for other FDA-approved urinary biomarkers (37).  
476 Furthermore, no investigations were performed in patients that had a positive test but a  
477 negative cystoscopy to rule out the presence of upper tract tumors.  
478 Collectively, this prospective study provides evidence on the clinical relevance of the  
479 BC-116 and BC-106 biomarker classifiers for BC screening and monitoring. As  
480 supported by the presented results, such non-invasive biomarker panels can facilitate  
481 BC diagnosis (BC-116) and can be applied as adjuncts to cystoscopy in combination  
482 with cytology (BC-106) to reduce the number of follow-up cystoscopies as well as  
483 patient discomfort and financial burden.

484

## 485 **Acknowledgments**

486 This work was supported in part by BioMedBC (752755; H2020-MSCA-IF-2016), funded  
487 by the European Commission.

488

489

490

491

492

493

494

495

496

497

498

## 499 References

- 500 1. Ferlay J, Shin HR, Bray F, Forman D, Mathers C, Parkin DM. Estimates of worldwide  
501 burden of cancer in 2008: GLOBOCAN 2008. *International journal of cancer*  
502 **2010**;127(12):2893-917 doi 10.1002/ijc.25516.
- 503 2. Sung H, Ferlay J, Siegel RL, Laversanne M, Soerjomataram I, Jemal A, *et al.* Global  
504 Cancer Statistics 2020: GLOBOCAN Estimates of Incidence and Mortality Worldwide  
505 for 36 Cancers in 185 Countries. *CA: a cancer journal for clinicians* **2021**;71(3):209-49  
506 doi 10.3322/caac.21660.
- 507 3. ACS. *Cancer Facts & Figures 2014*. Atlanta, GA, USA: American Cancer Society; 2014.
- 508 4. Kamat AM, Hahn NM, Efstathiou JA, Lerner SP, Malmstrom PU, Choi W, *et al.* Bladder  
509 cancer. *Lancet* **2016**;388(10061):2796-810 doi 10.1016/S0140-6736(16)30512-8.
- 510 5. Babjuk M, Burger M, Comperat EM, Gontero P, Mostafid AH, Palou J, *et al.* European  
511 Association of Urology Guidelines on Non-muscle-invasive Bladder Cancer (TaT1 and  
512 Carcinoma In Situ) - 2019 Update. *European urology* **2019**;76(5):639-57 doi  
513 10.1016/j.eururo.2019.08.016.
- 514 6. Maas M, Bedke J, Stenzl A, Todenhofer T. Can urinary biomarkers replace cystoscopy?  
515 *World journal of urology* **2019**;37(9):1741-9 doi 10.1007/s00345-018-2505-2.
- 516 7. Kaufman DS, Shipley WU, Feldman AS. Bladder cancer. *Lancet* **2009**;374(9685):239-49  
517 doi 10.1016/S0140-6736(09)60491-8.
- 518 8. Ribal MJ, Cornford P, Briganti A, Knoll T, Gravas S, Babjuk M, *et al.* European  
519 Association of Urology Guidelines Office Rapid Reaction Group: An Organisation-  
520 wide Collaborative Effort to Adapt the European Association of Urology Guidelines  
521 Recommendations to the Coronavirus Disease 2019 Era. *European urology*  
522 **2020**;78(1):21-8 doi 10.1016/j.eururo.2020.04.056.
- 523 9. Freifeld Y, Lotan Y. Effect of blue-light cystoscopy on contemporary performance of  
524 urine cytology. *BJU international* **2019**;124(2):251-7 doi 10.1111/bju.14574.
- 525 10. Christensen E, Birkenkamp-Demtroder K, Nordentoft I, Hoyer S, van der Keur K, van  
526 Kessel K, *et al.* Liquid Biopsy Analysis of FGFR3 and PIK3CA Hotspot Mutations for  
527 Disease Surveillance in Bladder Cancer. *European urology* **2017**;71(6):961-9 doi  
528 10.1016/j.eururo.2016.12.016.
- 529 11. Chakraborty A, Dasari S, Long W, Mohan C. Urine protein biomarkers for the  
530 detection, surveillance, and treatment response prediction of bladder cancer.  
531 *American journal of cancer research* **2019**;9(6):1104-17.
- 532 12. Siwy J, Mullen W, Golovko I, Franke J, Zurbig P. Human urinary peptide database for  
533 multiple disease biomarker discovery. *Proteomics Clinical applications* **2011**;5(5-  
534 6):367-74 doi 10.1002/prca.201000155.
- 535 13. Latosinska A, Siwy J, Mischak H, Frantzi M. Peptidomics and proteomics based on CE-  
536 MS as a robust tool in clinical application: The past, the present, and the future.  
537 *Electrophoresis* **2019**;40(18-19):2294-308 doi 10.1002/elps.201900091.
- 538 14. Klein J, Papadopoulos T, Mischak H, Mullen W. Comparison of CE-MS/MS and LC-  
539 MS/MS sequencing demonstrates significant complementarity in natural peptide  
540 identification in human urine. *Electrophoresis* **2014**;35(7):1060-4 doi  
541 10.1002/elps.201300327.
- 542 15. Dakna M, He Z, Yu WC, Mischak H, Kolch W. Technical, bioinformatical and statistical  
543 aspects of liquid chromatography-mass spectrometry (LC-MS) and capillary  
544 electrophoresis-mass spectrometry (CE-MS) based clinical proteomics: a critical  
545 assessment. *Journal of chromatography B, Analytical technologies in the biomedical  
546 and life sciences* **2009**;877(13):1250-8 doi 10.1016/j.jchromb.2008.10.048.
- 547 16. Theodorescu D, Wittke S, Ross MM, Walden M, Conaway M, Just I, *et al.* Discovery and  
548 validation of new protein biomarkers for urothelial cancer: a prospective analysis. *The  
549 Lancet Oncology* **2006**;7(3):230-40 doi 10.1016/S1470-2045(06)70584-8.
- 550 17. Schiffer E, Vlahou A, Petrolekas A, Stravodimos K, Tauber R, Geschwend JE, *et al.*  
551 Prediction of muscle-invasive bladder cancer using urinary proteomics. *Clinical*



- 552 cancer research : an official journal of the American Association for Cancer Research  
553 **2009**;15(15):4935-43 doi 10.1158/1078-0432.CCR-09-0226.
- 554 18. Frantzi M, Vlahou A. Ten Years of Proteomics in Bladder Cancer: Progress and Future  
555 Directions. *Bladder cancer* **2017**;3(1):1-18 doi 10.3233/BLC-160073.
- 556 19. Frantzi M, van Kessel KE, Zwarthoff EC, Marquez M, Rava M, Malats N, *et al.*  
557 Development and Validation of Urine-based Peptide Biomarker Panels for Detecting  
558 Bladder Cancer in a Multi-center Study. *Clinical cancer research : an official journal*  
559 *of the American Association for Cancer Research* **2016**;22(16):4077-86 doi  
560 10.1158/1078-0432.ccr-15-2715.
- 561 20. Krochmal M, van Kessel KEM, Zwarthoff EC, Belczacka I, Pejchinovski M, Vlahou A, *et*  
562 *al.* Urinary peptide panel for prognostic assessment of bladder cancer relapse.  
563 *Scientific reports* **2019**;9(1):7635 doi 10.1038/s41598-019-44129-y.
- 564 21. Humphrey PA, Moch H, Cubilla AL, Ulbright TM, Reuter VE. The 2016 WHO  
565 Classification of Tumours of the Urinary System and Male Genital Organs-Part B:  
566 Prostate and Bladder Tumours. *European urology* **2016**;70(1):106-19 doi  
567 10.1016/j.eururo.2016.02.028.
- 568 22. Brierley JD, Brierley JD, Gospodarowicz MK, Wittekind C. TNM Classification of  
569 Malignant Tumours. Chichester: John Wiley & Sons, Incorporated; 2016. 1 online  
570 resource (274 pages) p.
- 571 23. Babjuk M, Burger M, Compérat E, Gontero P, Mostafid AH, Palou J, *et al.* EAU  
572 Guidelines on Non-muscle-invasive Bladder Cancer (TaT1 and CIS). EAU Guidelines  
573 Office, Arnhem, The Netherlands.; 2018.
- 574 24. Argilés À, Siwy J, Duranton F, Gayraud N, Dakna M, Lundin U, *et al.* CKD273, a New  
575 Proteomics Classifier Assessing CKD and Its Prognosis. *PLOS ONE* **2013**;8(5):e62837 doi  
576 10.1371/journal.pone.0062837.
- 577 25. Neuhoff N, Kaiser T, Wittke S, Krebs R, Pitt A, Burchard A, *et al.* Mass spectrometry for  
578 the detection of differentially expressed proteins: a comparison of surface-enhanced  
579 laser desorption/ionization and capillary electrophoresis/mass spectrometry. *Rapid*  
580 *communications in mass spectrometry : RCM* **2004**;18(2):149-56 doi 10.1002/rcm.1294.
- 581 26. Jantos-Siwy J, Schiffer E, Brand K, Schumann G, Rossing K, Delles C, *et al.* Quantitative  
582 urinary proteome analysis for biomarker evaluation in chronic kidney disease. *Journal*  
583 *of proteome research* **2009**;8(1):268-81 doi 10.1021/pr800401m.
- 584 27. Coon JJ, Zurbig P, Dakna M, Dominiczak AF, Decramer S, Fliser D, *et al.* CE-MS analysis  
585 of the human urinary proteome for biomarker discovery and disease diagnostics.  
586 *Proteomics Clinical applications* **2008**;2(7-8):964 doi 10.1002/prca.200800024.
- 587 28. DeLeo JM. Receiver operating characteristic laboratory (ROCLAB): Software for  
588 developing decision strategies that account for uncertainty. *Uncertainty Modeling*  
589 *and Analysis, 1993 Proceedings, Second International Symposium on* **1993**:318-25.
- 590 29. Ng K, Stenzl A, Sharma A, Vasdev N. Urinary biomarkers in bladder cancer: A review  
591 of the current landscape and future directions. *Urologic oncology* **2021**;39(1):41-51  
592 doi 10.1016/j.urolonc.2020.08.016.
- 593 30. Soria F, Droller MJ, Lotan Y, Gontero P, D'Andrea D, Gust KM, *et al.* An up-to-date  
594 catalog of available urinary biomarkers for the surveillance of non-muscle invasive  
595 bladder cancer. *World journal of urology* **2018**;36(12):1981-95 doi 10.1007/s00345-018-  
596 2380-x.
- 597 31. Frantzi M, Latosinska A, Belczacka I, Mischak H. Urinary proteomic biomarkers in  
598 oncology: ready for implementation? *Expert review of proteomics* **2019**;16(1):49-63  
599 doi 10.1080/14789450.2018.1547193.
- 600 32. Konety B, Shore N, Kader AK, Porten S, Daneshmand S, Lough T, *et al.* Evaluation of  
601 Cxbladder and Adjudication of Atypical Cytology and Equivocal Cystoscopy.  
602 *European urology* **2019**;76(2):238-43 doi 10.1016/j.eururo.2019.04.035.
- 603 33. van der Heijden AG, Mengual L, Ingelmo-Torres M, Lozano JJ, van Rijt-van de Westerlo  
604 CCM, Baixauli M, *et al.* Urine cell-based DNA methylation classifier for monitoring  
605 bladder cancer. *Clinical epigenetics* **2018**;10:71 doi 10.1186/s13148-018-0496-x.
- 606 34. Grossman HB, Gomella L, Fradet Y, Morales A, Presti J, Ritenour C, *et al.* A phase III,  
607 multicenter comparison of hexaminolevulinate fluorescence cystoscopy and white

608 light cystoscopy for the detection of superficial papillary lesions in patients with  
609 bladder cancer. *The Journal of urology* **2007**;178(1):62-7 doi 10.1016/j.juro.2007.03.034.  
610 35. Wang Z, Que H, Suo C, Han Z, Tao J, Huang Z, *et al.* Evaluation of the NMP22  
611 BladderChek test for detecting bladder cancer: a systematic review and meta-  
612 analysis. *Oncotarget* **2017**;8(59):100648-56 doi 10.18632/oncotarget.22065.  
613 36. Dimashkieh H, Wolff DJ, Smith TM, Houser PM, Nietert PJ, Yang J. Evaluation of  
614 urovysion and cytology for bladder cancer detection: a study of 1835 paired urine  
615 samples with clinical and histologic correlation. *Cancer cytopathology*  
616 **2013**;121(10):591-7 doi 10.1002/cncy.21327.  
617 37. Yoder BJ, Skacel M, Hedgepeth R, Babineau D, Ulchaker JC, Liou LS, *et al.* Reflex  
618 UroVysion testing of bladder cancer surveillance patients with equivocal or negative  
619 urine cytology: a prospective study with focus on the natural history of anticipatory  
620 positive findings. *American journal of clinical pathology* **2007**;127(2):295-301 doi  
621 10.1309/ADJL7E810U1H42BJ.  
622  
623  
624  
625  
626  
627  
628  
629  
630  
631  
632  
633  
634  
635  
636  
637  
638  
639  
640  
641  
642  
643  
644  
645  
646

647 **Table 1.** Clinical and demographical characteristics of the patients screened for primary  
648 **(Study Arm I)** and recurrence BC **(Study Arm II)**.

649

650

|                                                                            | <b>Number of recruited patients</b>           |
|----------------------------------------------------------------------------|-----------------------------------------------|
| <b>Study Arm I: Evaluation of nomogram for detecting Primary BC</b>        | <b>73</b>                                     |
| Primary BC patients (%)                                                    | 27 (37.0)                                     |
| Urological controls (%)                                                    | 46 (63.0)                                     |
| Median Age (IQR)                                                           | 66 (16.5)                                     |
| Gender (M/F; %)                                                            | 52 M (71.2) / 21 F (28.8)                     |
| Stage classification (TNM) for primary BC*                                 |                                               |
| ▪ Ta (%)                                                                   | 14 (51.9)                                     |
| ▪ T1 (%)                                                                   | 6 (22.2)                                      |
| ▪ T3 (%)                                                                   | 1 (3.7)                                       |
| ▪ Tis (%)                                                                  | 1 (3.7)                                       |
| ▪ Tx (%)                                                                   | 5 (18.5)                                      |
| Grade classification for primary BC*                                       |                                               |
| ▪ Low grade (%)                                                            | 14 (51.9)                                     |
| ▪ High Grade (%)                                                           | 10 (37.0)                                     |
| ▪ Gx (%)                                                                   | 3 (11.1)                                      |
| Risk assessment for primary BC*                                            |                                               |
| ▪ High risk (%)                                                            | 11 (40.7)                                     |
| ▪ Low risk (%)                                                             | 15 (55.6)                                     |
| ▪ Unknown (%)                                                              | 1 (3.7)                                       |
| Concomitant Tis (Yes/ No/ Unknown)                                         | 3 (11.1) / 13 (48.2) / 11 (40.7)              |
| Cytology (Positive / Negative / NA)                                        | 14 (19.2) / 44 (60.3) / 15 (20.5)             |
| <b>Study Arm II: Evaluation of nomogram for detecting recurrent BC</b>     | <b>478</b>                                    |
| Positive for recurrent BC (%)                                              | 83 (17.4)                                     |
| Negative for recurrence (%)                                                | 395 (82.6)                                    |
| Median Age (IQR)                                                           | 71 (15)                                       |
| Gender (M/F; %)                                                            | 381 M (79.7) / 97 F (20.3)                    |
| Stage classification (TNM) for recurrent BC*                               |                                               |
| ▪ Ta (%)                                                                   | 58 (69.9)                                     |
| ▪ T1 (%)                                                                   | 11 (13.6)                                     |
| ▪ T2 (%)                                                                   | 3 (3.6)                                       |
| ▪ T4 (%)                                                                   | 1 (1.2)                                       |
| ▪ Tis (%)                                                                  | 10 (12.0)                                     |
| Grade classification for recurrent BC*                                     |                                               |
| ▪ Low grade (%)                                                            | 55 (62.3)                                     |
| ▪ High Grade (%)                                                           | 25 (30.1)                                     |
| ▪ Gx (%)                                                                   | 3 (3.6)                                       |
| Risk assessment for recurrent BC*                                          |                                               |
| ▪ High risk (%)                                                            | 30 (36.1)                                     |
| ▪ Intermediate risk (%)                                                    | 27 (32.5)                                     |
| ▪ Low risk (%)                                                             | 25 (30.1)                                     |
| ▪ Unknown (%)                                                              | 1 (1.2)                                       |
| ▪ Cytology (Positive / Negative / Atypia / NA)                             | 33 (6.9) / 285 (59.6) / 19 (4.0) / 141 (29.5) |
| <b>Excluded patients because of comorbidities</b>                          | <b>18</b>                                     |
| <b>Excluded patients as TURB-T was not available to confirm cystoscopy</b> | <b>33</b>                                     |
| <b>Total number of recruited patients</b>                                  | <b>602</b>                                    |

651 **Abbreviations:** **BC:** bladder cancer; **F:** female; **IQR:** interquartile range; **M:** male; **NA:** not available;  
652 **TNM:** tumor, node, metastasis; **Tis:** carcinoma in situ; **TURB-T:** Transurethral resection of bladder tumor.  
653 \*Tumor grade and stage were determined according to WHO criteria (21) and TNM classification (22),  
654 while the BC tumors were classified according to their risk of recurrence and progression into high,  
655 intermediate, or low risk based on the EAU guidelines published in 2018 (23).

656

657

658

659

660

661

662

663

664

665

666

667

668

669

670

671

672

673

674

675

676

677

678

679

680

681

682

683

684

685

686 **Figures**

687

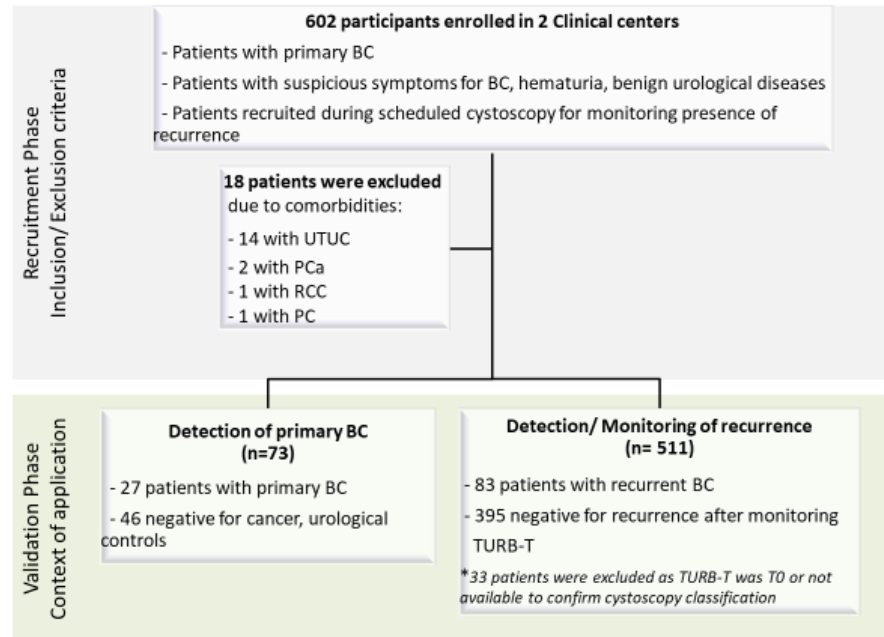

688

689

690

691

692 **Figure 1.** Schematic representation of the study workflow. Patients with primary BC,  
693 recurrent BC and urological controls were enrolled at two different clinical centers  
694 (Hospital Clinic of Barcelona and Radboud University Medical Center). Patients  
695 encountering other comorbidities were excluded from this study (n=18). A total number  
696 of 584 participants were considered for further analysis and stratified into two cohorts.  
697 The primary cohort was consisted of patients with primary BC (n=73) whereas the  
698 recurrent cohort comprised of patients with BC recurrences (n=83) and those negative  
699 for recurrence controls (n=395). **Abbreviations: BC:** bladder cancer; **UTUC:** Upper  
700 tract urothelial carcinoma; **PC;** pancreatic cancer; **PCa:** prostate cancer; **RCC:** renal cell  
701 carcinoma; **TURBT:** trans urethral resection of bladder tumor.

702

It is made available under a [CC-BY-NC-ND 4.0 International license](https://creativecommons.org/licenses/by-nc-nd/4.0/).

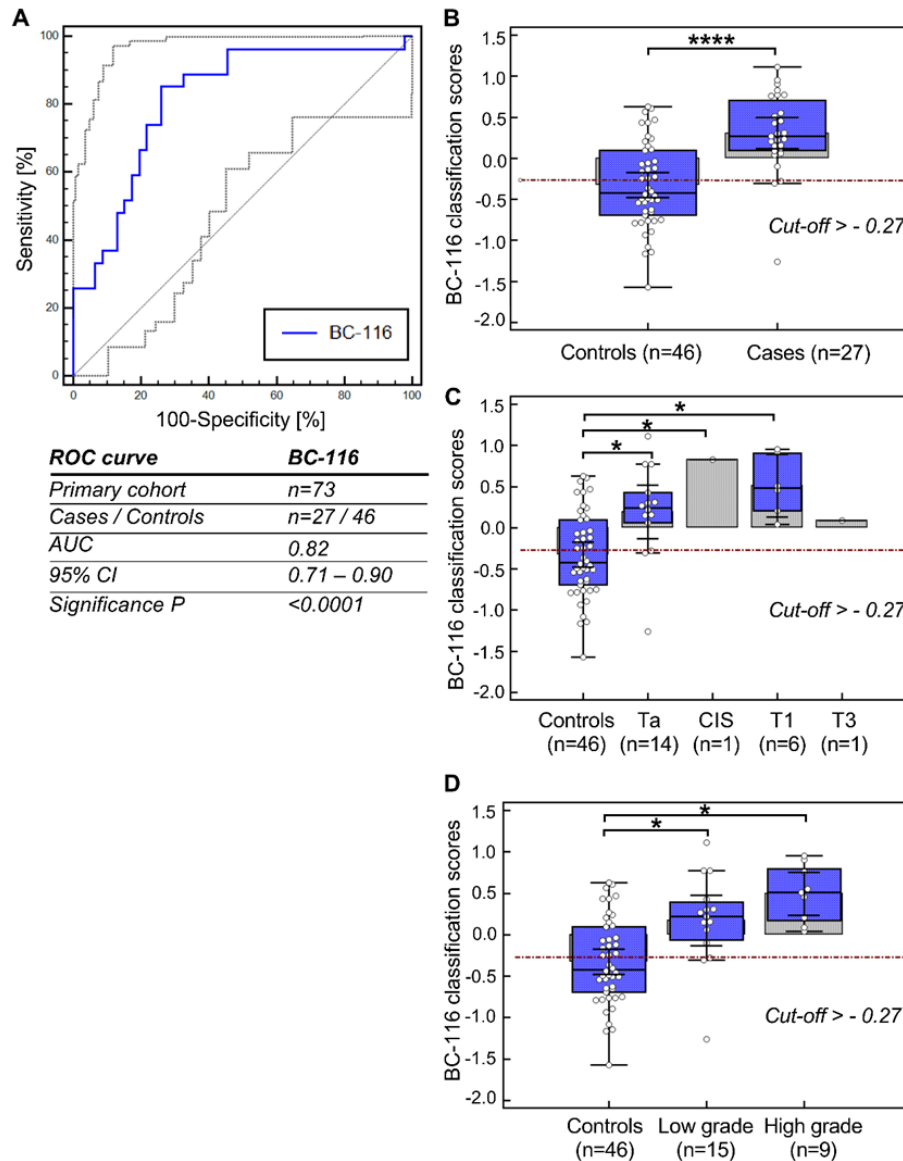

725

726 **Figure 2. A**, ROC curve analysis for the urinary biomarker panel BC-116 performed in  
727 the primary cohort. The AUC, 95% CI, and P value for the classification of the BC  
728 patients are also provided in the table shown in Panel **A**. **B-D**, Classification scores  
729 presented in Box-and-Whisker displaying the level of discrimination between **B**) the  
730 urothelial BC cases and the urologic controls, **C**) BC cases and controls according to  
731 their TNM stage, and **D**) BC cases and controls considering their grade. The average  
732 rank differences were significantly different (\*\*\*\* $P \leq 0.0001$  and \* $P < 0.05$ ) as defined with  
733 Kruskal-Wallis H test.

734

735

736

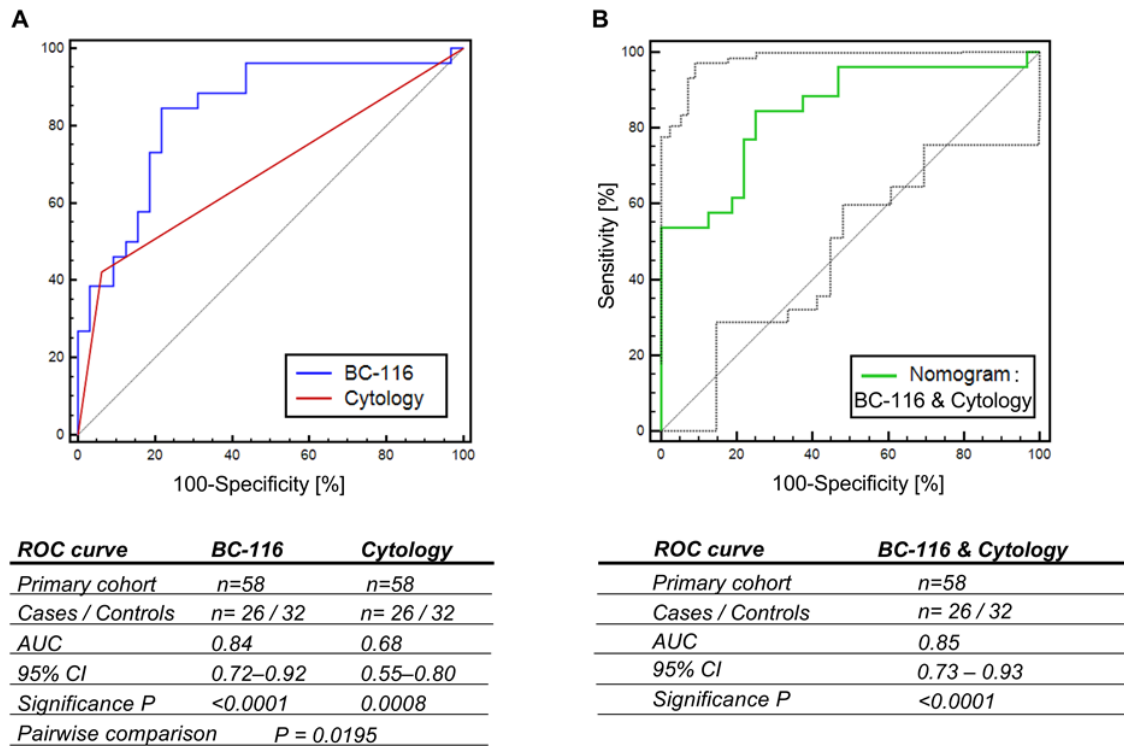

737

738

739

740 **Figure 3.**

741 **A**, ROC curves for the urinary BC-116 biomarker panel and the cytology as performed  
 742 to those patients from the primary cohort with available cytological data. **B**, ROC curve  
 743 for the integrative nomogram including the BC-116 biomarker panel and the cytology.  
 744 The AUCs, 95% Cis, and P values are provided in the respective tables.

745

746

747

748

749

750

751

752

753

754

755

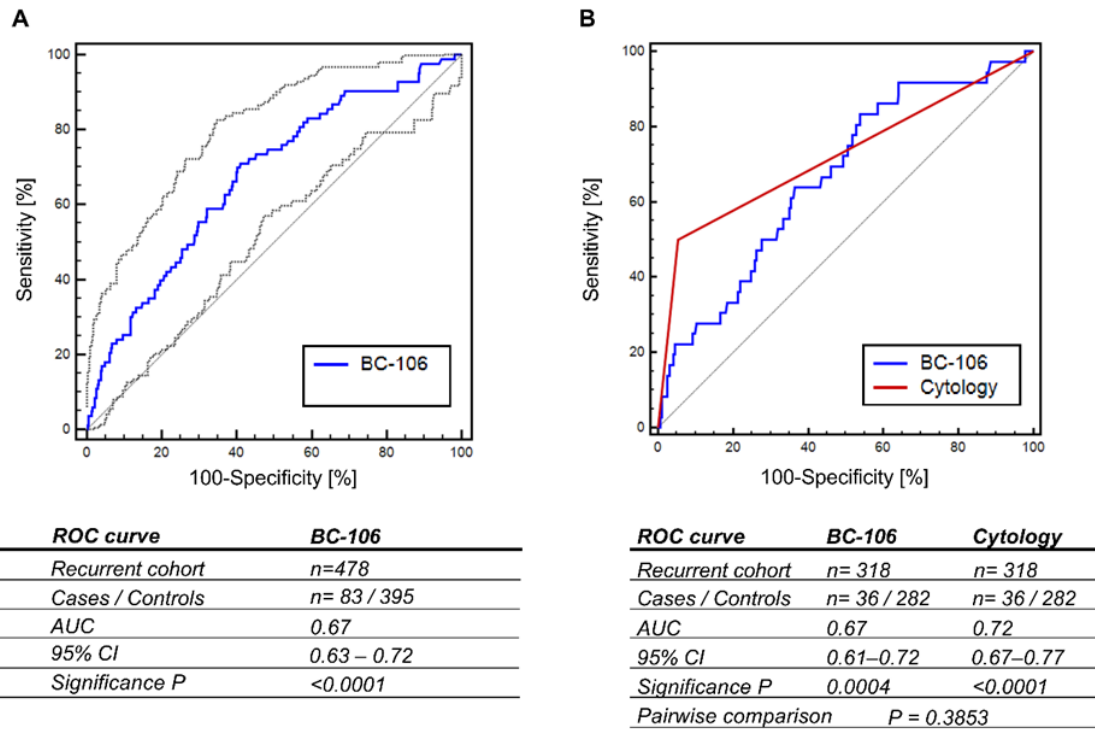

756

757

758

759

760

761 **Figure 4.**

762 **A**, ROC curve for the BC-106 urinary biomarker panel, consisting of 106 peptides as  
 763 performed in the recurrent cohort. **B**, ROC curve analysis for the urinary BC-106  
 764 biomarker panel as performed in those patients from the recurrence cohort with  
 765 available cytological data. The AUCs, 95% Cis and P values are provided for the  
 766 classification of recurrent BC patients.

767

768

769

770

771

772

773



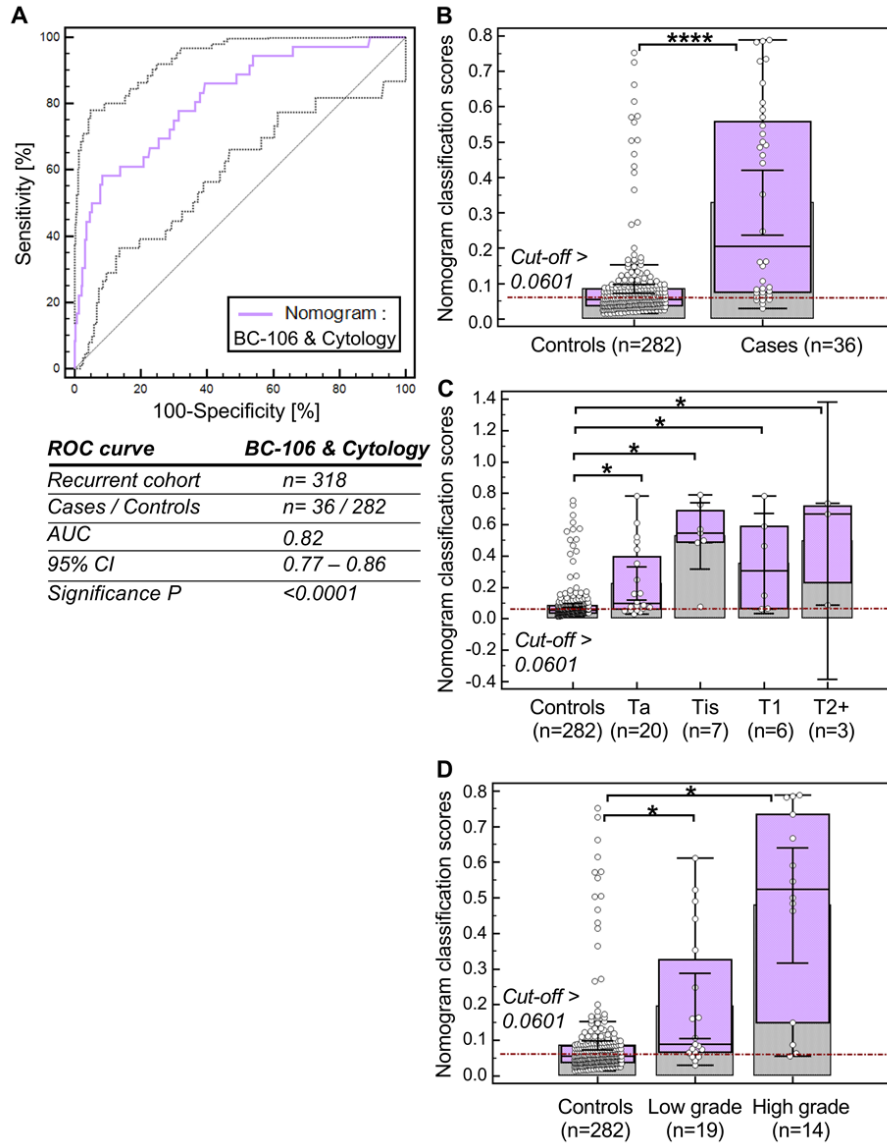

774

775 **Figure 5.**

776 **A**, ROC curve analysis for the integrative nomogram including the urinary BC-106  
777 biomarker panel and cytology, as performed in 318 patients (consisted of 36 positive  
778 and 282 negative for recurrence controls) with available cytological data from the  
779 recurrent cohort. The AUC, 95% CI, and P value for the integrative nomogram are  
780 provided in the table in panel A. **B-D**, Classification scores presented in Box-and-  
781 Whisker displaying the level of discrimination between **B**) the recurrence BC cases and  
782 the negative for recurrence controls, **C**) the recurrence BC cases and the negative for  
783 recurrence controls among stage, and **D**) the recurrence BC cases and the negative for  
784 recurrence controls among grade groups. The average rank differences were  
785 significantly different ((\*\*\*\* $P \leq 0.0001$  and \* $P = 0.05$ ) as defined by Kruskal-Wallis H test.

786 **Supplementary Files**

787

788 **Supplementary Table S1.** Clinical and demographical data for the 73 samples from  
789 patients with primary BC.

790

791 **Supplementary Table S2.** Clinical and demographical data for the urine samples (n=  
792 478) from recurrent BC patients.

793

794 **Supplementary Table S3.** List of scoring data for 73 patients with primary BC and 478  
795 patients that were screened for recurrent BC.
